# Supplementary material for: Pharmacological Basis for the Use of Evodiamine in Alzheimer’s Disease: Antioxidation and Antiapoptosis
Source: MDPI journal article supplement (doi:10.3390/ijms19051527), 2018-05-21
Supplement: s1 [file s1]

## Supplementary data

**Table S1.** The effects of Evo on bodyweights in Alzheimer's disease mice

| Doses                          |         | 91-day treatment |          |          |          |          |          |          |
|--------------------------------|---------|------------------|----------|----------|----------|----------|----------|----------|
|                                |         | 0                | 21       | 35       | 49       | 63       | 77       | 91       |
| CTRL                           | --      | 20.8±0.5         | 25.8±0.3 | 26.7±0.3 | 28.0±0.5 | 28.8±0.5 | 29.2±0.4 | 29.3±0.4 |
| Evo                            | 40mg/kg | 21.2±0.3         | 25.7±0.2 | 24.8±0.5 | 28.3±0.3 | 29.7±0.2 | 30.3±0.1 | 30.0±0.2 |
| AlCl <sub>3</sub> + D-gal      | --      | 21.3±0.3         | 23.5±0.2 | 23.0±0.5 | 26.5±0.4 | 27.7±0.2 | 28.7±0.2 | 27.7±0.4 |
| AlCl <sub>3</sub> + D-gal +Evo | 10mg/kg | 20.1±0.5         | 24.3±0.3 | 24.4±0.4 | 27.2±0.3 | 27.9±0.3 | 28.2±0.3 | 28.4±0.2 |
| AlCl <sub>3</sub> + D-gal +Evo | 40mg/kg | 19.9±0.5         | 24.9±0.3 | 24.5±0.5 | 27.4±0.4 | 27.4±0.3 | 27.8±0.3 | 28.2±0.3 |

Data are expressed as mean ± S.E.D. (n=18) and analyzed by using a one-way ANOVA.

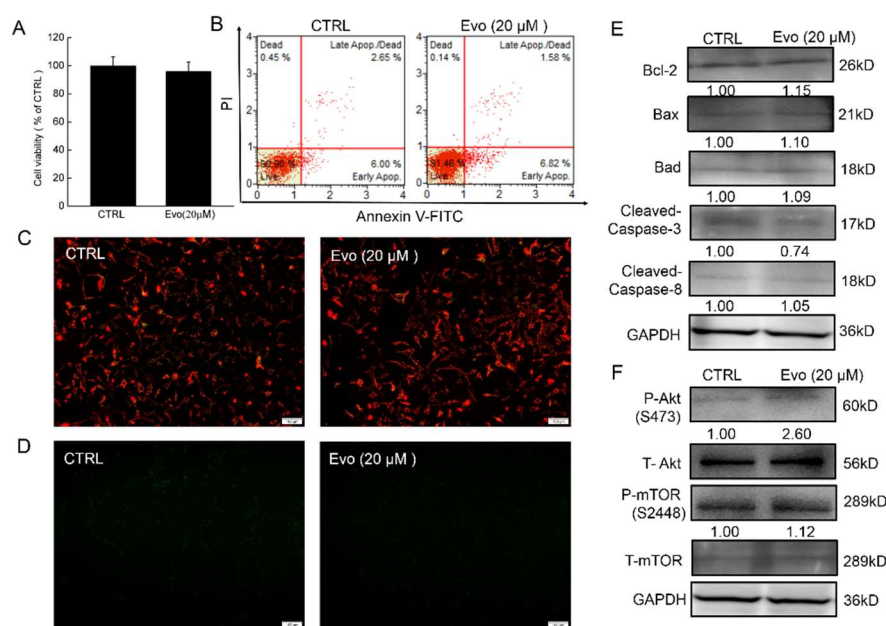

**Figure S1.** 24-h incubation with 20  $\mu$ M of Evo had no significant effects on (A) cell viability, (B) apoptosis rate, (C) the dissipation of MMP and (D) the over-accumulation of ROS in HT22 cells (n=10). (E and F) Evo reduced the expression levels of cleaved-caspase-3, increased the expression levels of P-Akt, but showed no significant effect on the expression levels of Bcl-2, Bax, Bad, P-mTOR and cleaved-caspase-8. Quantification data were normalized by (E) GAPDH and (F) corresponding total proteins, and the average fold increase in band intensity compared with the CTRL group are marked respectively (n=6).
